# Supplementary material for: Enhanced upgrading of corncob to furfuryl alcohol with a novel silica-supported SO42−-TiO2 chemocatalyst and immobilized whole-cell biocatalyst
Source: Royal Society of Chemistry journal article supplement (doi:10.1039/d3gc01764h), 2023-01-01
Supplement: d3gc01764h1.pdf [file d3gc01764h1.pdf]

## Support Information

### Figure Captions

**Figures S1.** Before (a) and after (b) recovery of nano-Fe<sub>3</sub>O<sub>4</sub> using a magnet.

**Figures S2.** N<sub>2</sub> adsorption-desorption isotherms of SO<sub>4</sub><sup>2-</sup>-TiO<sub>2</sub>/SiO<sub>2</sub> (a); NH<sub>3</sub>-TPD of SO<sub>4</sub><sup>2-</sup>-TiO<sub>2</sub>/SiO<sub>2</sub> (b).

**Figures S3.** Construction process of recombinant *E. coli* EF22.

**Figures S4.** The thermal stability of free cells and EF22@SA/Fe<sub>3</sub>O<sub>4</sub> (a); The reusability of free cells and EF22@SA/Fe<sub>3</sub>O<sub>4</sub> (b).

**Figures S5.** HPLC analysis of FFA and FFAC.

**a**

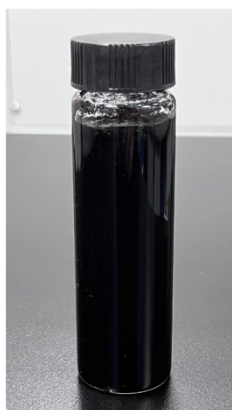

**b**

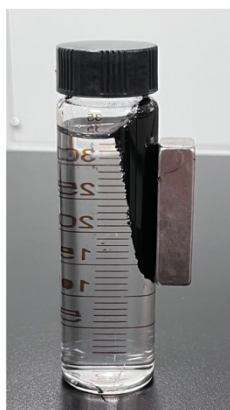

**Figures S1**

**a**

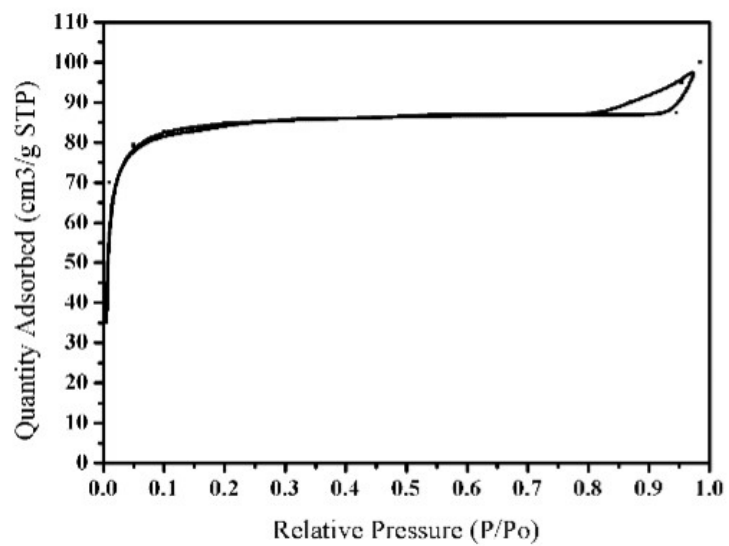

**b**

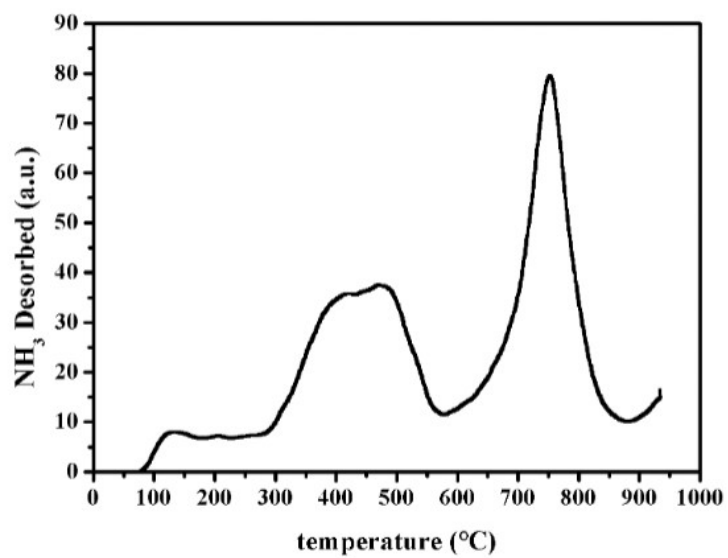

**Figures S2**

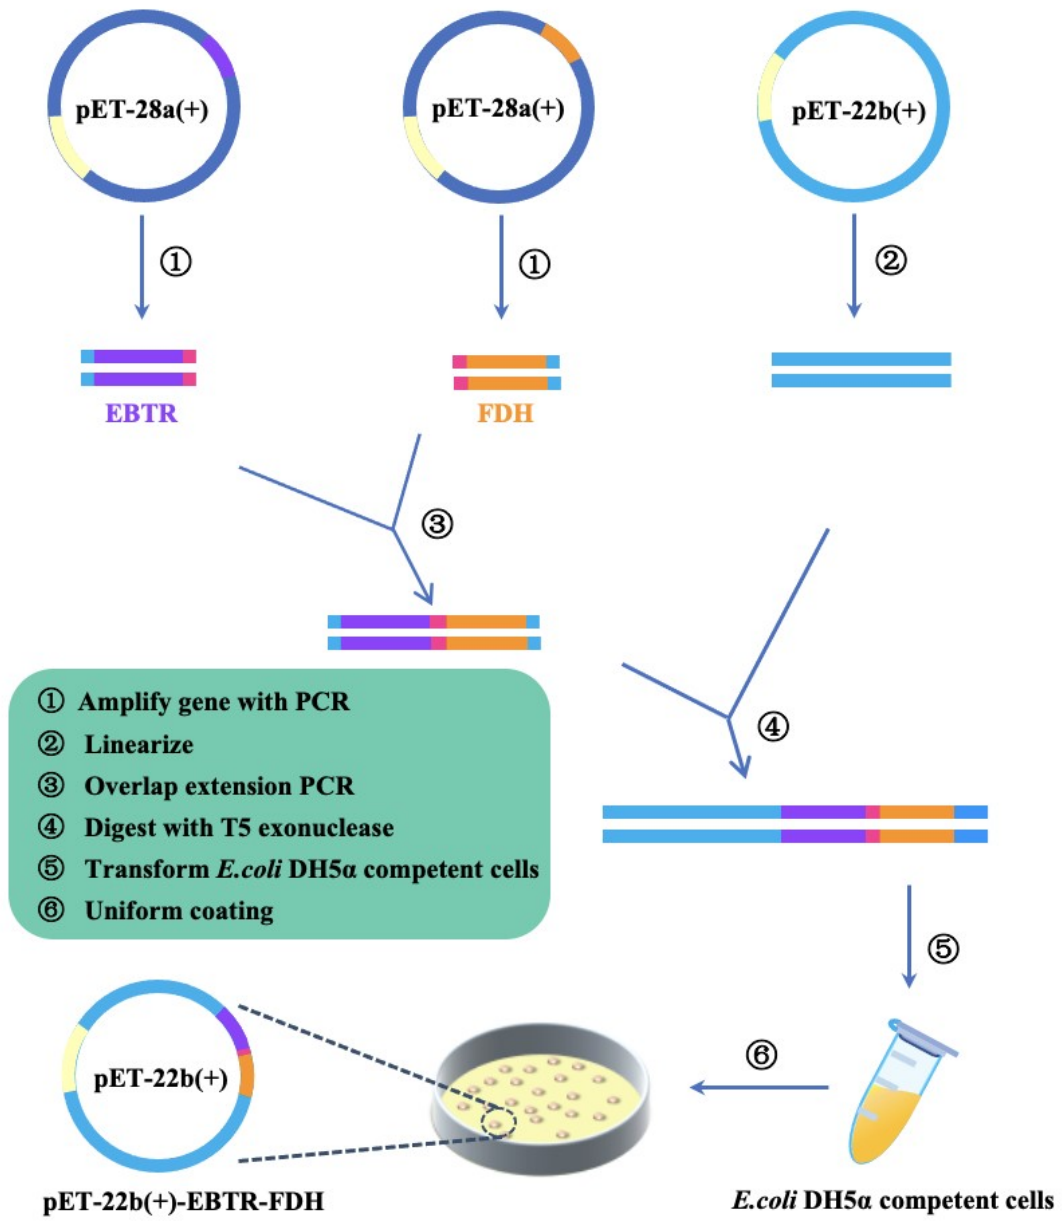

Figures S3

**a**

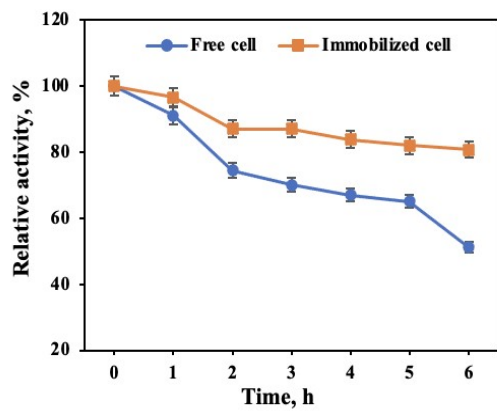

**b**

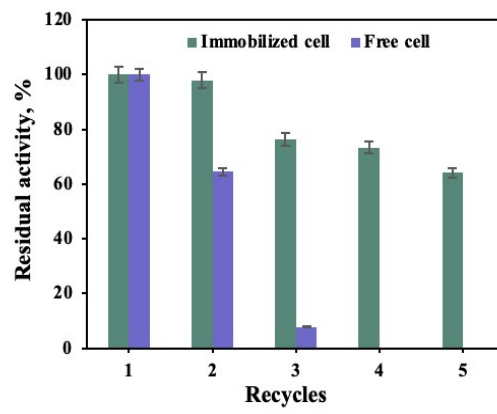

**Figures S4**

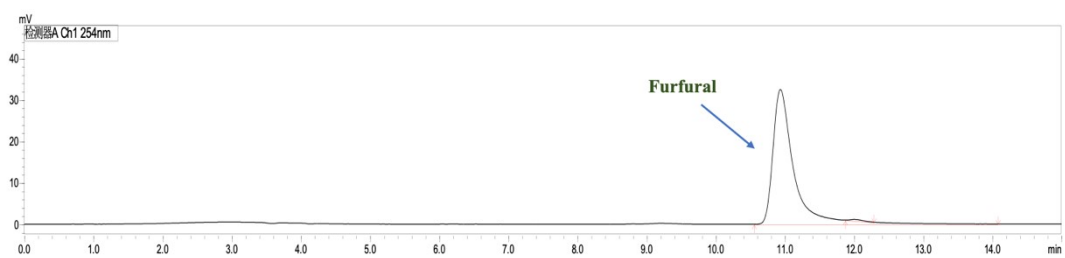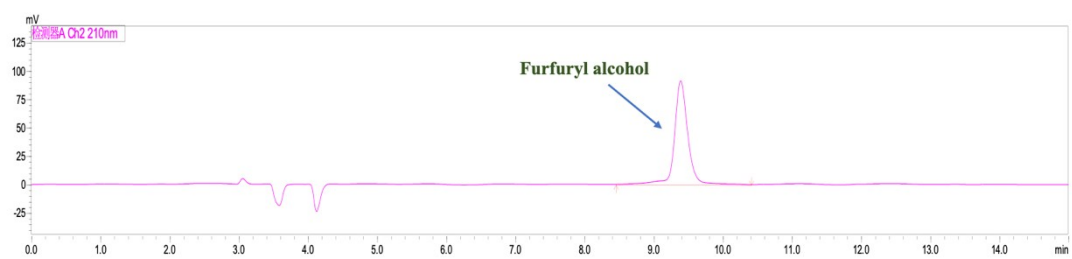

**Figures S5**
